# Supplementary material
Source: publisher figshare collection journal article supplement (https://rs.figshare.com/ndownloader/files/14132057)
Supplement: Supplementary file 1 [file 14132057]

## Sheet: S11 - Input
	Table S11. Data matrix for ancestral state reconstruction. 19 morphological characters and their state distributions for 54 taxa. Numbers indicate states defined in the header; numbers in parenthesis indicate taxa displaying multiple states; “-” marks indicate that the character is not applicable to the taxon in question; “?” indicate that the state is unknown for the taxon in question. Data was …					1	2	3	4	5	6	7	8	9	10	11	12	13	14	15	16	17	18	19
						Body size (anterior margin of head - posterior margin of last segment, without cerci or other appendages) in mm: (0) smaller than 6.5; (1) 6.5-15; (2) 15-30; (3) above 30	Ratio between body length and maximum width: (0) smaller than 2; (1) 2-2.5; (2) 2.6-3.5; (3) 3.5-5; (4) above 5	Maternal brood care: (0) absent; (1) present	Long-lasting biparental care: (0) absent; (1) present	Eusociality: (0) absent, (1) present	Mode of reproduction: (0) Oviparity; (1) false ovoviviparous or false viviparous; (2) viviparity	Ootheca: presence (1) or absence (0)	Ootheca: (0) deposited; (1) carried around	Ootheca deposition: (0) laid directly into dug hole; (1) laid first, hole prepared, then ootheca moved into hole; (2) laid and ignored.	Advanced rotation of ootheca in vestibulum; (0) absent; (1) present.	Position of the ootheca during formation: (0) outside the body; (1) inside the body	Orientation of phallomere asymmetry; [0] normal: left complex on left side, right phallomere on right side; [1] reversed: left complex on right side, right phallomere on left side.	Symmetry of external genitalia: (0) strongly asymmetrical; (1) (almost) bilaterally symmetrical (including virtual absence). External genitalia refers to the genital phallomeres (not paraprocts or subgenital plate, or supraanal plate)	Nest (built galleries): (0) absent; (1) present	Wings: (0) absent; (1) present	Wings: (0) cannot be dropped; (1) can be dropped.	Anal field of hindwing folding: (0) folding simple; (1) folded fan-like	Tegminization of forewings; [0] absent; [1] present	Number of ocelli: (0) zero; (1) two; (2) three
1	Dictyoptera	Blattodea	Blaberidae	Blaberinae	Blaberus	3	1	1	0	0	1	1	1	-	1	1	1	0	0	1	0	1	1	1
2			Blaberidae	Diplopterinae	Diploptera	2	0	1	0	0	2	0	-	-	-	-	1	0	0	1	0	1	1	1
3			Blaberidae	Gyninae	Gyna	2	0	?	?	0	1	1	1	-	?	1	1	0	0	1	0	1	1	1
4			Blaberidae	Oxyhaloinae	Nauphoeta	2	3	1	0	0	1	1	1	-	1	1	1	0	0	1	0	1	1	1
5			Blaberidae	Oxyhaloinae	Princisia	3	1	1	0	0	1	1	1	-	1	1	1	0	0	0	-	-	-	1
6			Blaberidae	Panchlorinae	Panchlora	2	1	?	?	0	1	1	1	-	?	1	1	0	0	1	0	1	1	1
7			Blaberidae	Zetoborinae	Schultesia	2	1	?	?	0	1	1	1	-	?	1	1	0	0	1	0	1	1	1
8			Ectobiidae	Anallacta	Anallacta	2	1	?	?	0	0	1	?	?	?	1	1	0	0	1	0	1	1	1
9			Ectobiidae	Blattellinae	Loboptera	1	0	?	?	0	0	1	0	0	?	1	0	0	0	1	0	-	1	1
10			Ectobiidae	Blattellinae	Blattella	1	1	1	0	0	0	1	1	-	1	1	0	0	0	1	0	1	1	1
11			Ectobiidae	Blattellinae	Episymploce	1	3	?	?	0	0	1	?	?	?	1	0	0	0	1	0	1	1	1
12			Ectobiidae	Blattellinae	Symploce	1	3	0	0	0	0	1	0	(02)	?	1	0	0	0	1	0	1	1	1
13			Ectobiidae	Blattellinae	Asiablatta	2	3	?	?	0	0	1	?	?	?	1	?	0	0	1	0	?	1	1
14			Ectobiidae	Blattellinae	Paratemnopteryx	1	1	?	?	0	0	1	?	?	?	1	0	0	0	1	0	-	1	1
15			Ectobiidae	Blattellinae	Lobopterella	1	1	?	?	0	0	1	?	?	1	1	0	0	0	1	0	-	1	1
16			Ectobiidae	Blattellinae	Ischnoptera	2	1	0	0	0	0	1	?	?	1	1	0	0	0	1	0	1	1	1
17			Ectobiidae	Ecobiinae	Ectobius	1	1	0	0	0	0	1	0	0	?	1	0	0	0	1	0	1	1	1
18			Ectobiidae	Nyctiborinae	Nyctibora	3	1	?	?	0	0	1	0	-	1	1	0	0	0	1	0	1	1	1
19			Ectobiidae	Pseudphyllodromiinae	Supella	1	2	1	0	0	0	1	0	0	0	1	1	0	0	1	0	1	1	1
20			Ectobiidae	Pseudphyllodromiinae	Cariblatta	1	2	?	?	0	0	1	0	0	?	1	1	0	0	1	0	1	1	1
21			Ectobiidae	Pseudphyllodromiinae	Balta	1	1	?	?	0	0	1	0	0	?	1	1	0	0	1	0	1	1	1
22			Ectobiidae	Pseudphyllodromiinae	Ellipsidion	1	1	?	?	0	0	1	0	0	?	1	1	0	0	1	0	1	1	1
23			Ectobiidae	Pseudphyllodromiinae	Sundablatta	1	1	?	?	0	0	1	0	0	?	1	1	0	0	1	0	1	1	1
24			Ectobiidae	Pseudphyllodromiinae	Euthlastoblatta	1	1	?	?	0	0	1	0	0	?	1	1	0	0	1	0	1	1	1
25			Nocticolidae	Nocticolidae	Nocticola	0	2	0	0	0	0	1	?	?	?	1	0	0	0	1	0	0	0	1
26			Corydiidae	Corydiinae	Ergaula	2	0	0	0	0	0	1	0	2	0	1	0	0	0	1	0	0	1	1
27			Corydiidae	Corydiinae	Polyphaga	2	0	0	0	0	0	1	0	2	0	1	0	0	0	1	0	0	1	1
28			Corydiidae	Corydiinae	Therea	2	0	0	0	0	0	1	0	2	?	1	?	0	0	1	0	0	1	1
29			Corydiidae	Corydiinae	Eucorydia	1	0	0	0	0	0	1	0	2	?	1	0	0	?	1	0	0	1	1
30			Corydiidae	Tiviinae	Tivia	1	0	0	0	0	0	1	?	?	?	1	0	0	?	1	0	0	1	1
31			Tryonicidae	Tryonicinae	Tryonicus	1	1	?	?	0	0	1	0	0	?	1	0	0	0	0	-	-	-	1
32			Blattidae	Archiblattinae	Catara	2	0	0	0	0	0	1	0	0	?	1	0	0	?	1	0	1	1	1
33			Blattidae	Blattinae	Deropeltis	3	1	0	0	0	0	1	0	0	0	1	0	0	0	1	0	1	1	1
34			Blattidae	Blattinae	Shelfordella	2	2	0	0	0	0	1	0	0	?	1	0	0	0	1	0	1	1	1
35			Blattidae	Blattinae	Periplaneta	2	2	0	0	0	0	1	0	0	0	1	0	0	0	1	0	1	1	1
36			Blattidae	Polyzosteriinae	Eurycotis	3	1	0	0	0	0	1	0	0	0	1	0	0	0	1	0	-	1	1
37			Blattidae	Polyzosteriinae	Methana	2	1	0	0	0	0	1	0	0	?	1	0	0	?	1	0	1	1	1
38			Lamproblattidae	Lamproblattidae	Lamproblatta	2	2	0	0	0	0	1	0	1	0	1	0	0	0	0	-	-	-	1
39			Cryptocercidae	Cryptocercidae	Cryptocercus	2	1	1	1	0	0	1	0	1	0	1	0	0	1	0	-	-	-	0
40			Isoptera	Kalotermitidae	Incisitermes	1	3	1	1	1	0	0	-	-	-	-	-	1	1	1	1	-	0	1
41			Isoptera	Mastotermitidae	Mastotermes	3	2	1	1	1	0	1	?	?	0	1	-	1	1	1	1	0	0	1
42			Isoptera	Rhinotermitidae	Prorhinoternes	0	3	1	1	1	0	0	-	-	-	-	-	1	1	1	1	-	0	1
43			Isoptera	Rhinotermitidae	Coptotermes	0	3	1	1	1	0	0	-	-	-	-	-	1	1	1	1	-	0	1
44			Isoptera	Rhinotermitidae	Reticulitermes	0	3	1	1	1	0	0	-	-	-	-	-	1	1	1	1	-	0	1
45			Isoptera	Termopsinae	Zootermopsis	2	3	1	1	1	0	0	-	-	-	-	-	1	1	1	1	-	0	1
46			Mantodea	Mantis	Mantoida	2	4	?	0	0	0	1	0	-	-	0	0	0	0	1	0	1	1	2
47			Mantodea	Mantis	Metallyticus	3	4	?	0	0	0	1	0	-	-	0	0	0	0	1	0	1	1	2
48			Mantodea	Mantis	Empusa	3	4	?	0	0	0	1	0	-	-	0	0	?	0	1	0	1	1	2
49			Dermaptera		Echinosoma	0	1	1	0	0	0	0	-	-	-	-	-	0	0	1	0	1	1	0
50			Grylloblattodea		Grylloblatta	2	3	0	0	0	0	0	-	-	-	-	-	0	0	0	-	-	-	0
51			Mantophasmatodea		Karoophasma	2	3	0	0	0	0	0	-	-	-	-	-	1	0	0	-	-	-	0
52			Orthoptera		Locusta	3	2	0	0	0	0	0	-	-	-	-	-	?	0	1	0	1	1	2
53			Phasmatodea		Timema	2	3	0	0	0	0	0	-	-	-	-	-	1	0	1	0	1	1	2
54			Plecoptera		Dinocras	2	2	0	0	0	0	0	-	-	-	-	-	1	0	1	0	?	0	2
